# Supplementary material for: Constraining a hybrid volatility basis set model for aging ofwood burning emissions using smog chamber experiments
Source: Copernicus journal article supplement (doi:10.5194/gmd-2016-163), 2016-08-11
Supplement: Supplementary file 1 [file gmd-2016-163-supplement.pdf]

## Supplement

Table S1. List of NTVOCs compounds considered for the average mixture

| Compounds                                  |
|--------------------------------------------|
| phenol                                     |
| m-, o-, p-cresol                           |
| m-, o-, p-benzenediol /2-methylfuraldehyde |
| dimethylphenols                            |
| guaiacol/methylbenzenediols                |
| naphthalene                                |
| 2-methylnaphthalene/1-methylnaphthalene    |
| acenaphthylene                             |
| syringol                                   |
| biphenyl/acenaphthene                      |
| dimethylnaphthalene                        |

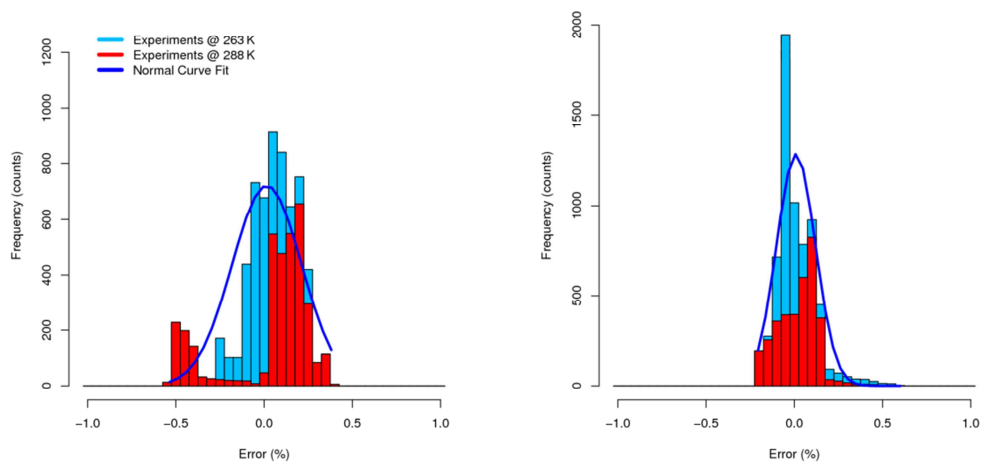

Figure S1. Best fitting solution error frequency distributions (counts per bin) for low (blue) and high temperature (red) experiments. Right side is the OA mass. Left side for the O:C ratio. Gaussian normal curve fit (for both temperatures) is reported in dark blue.

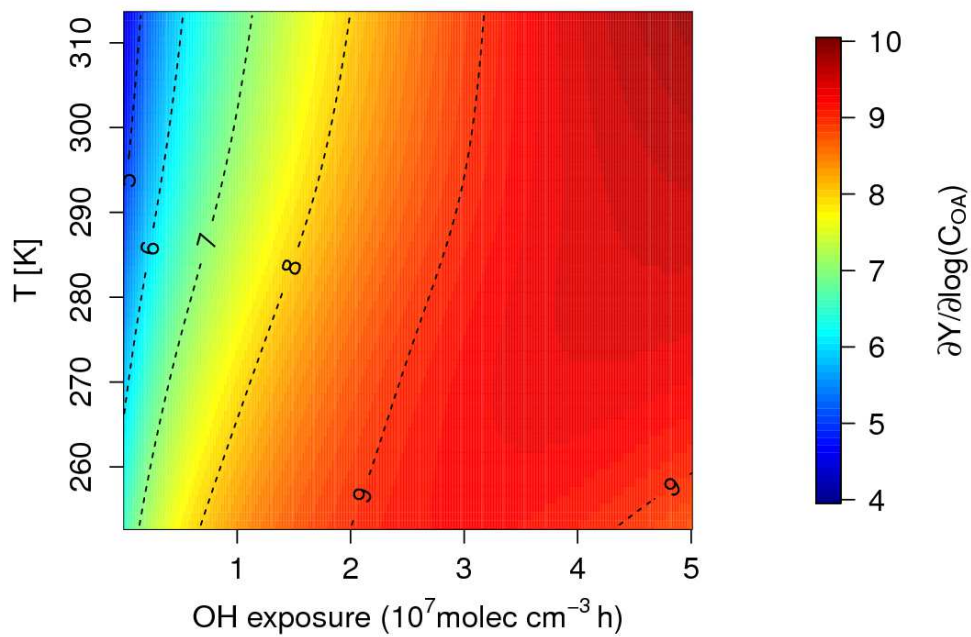

Figure S2. Variation of SOA yields with  $\log(C_{OA})$  (at 6, 60, 600  $\mu\text{g}/\text{m}^3$ ) as a function of  $T$  and OH exposure (from Figure 8, bottom panel).
